# Supplementary material for: Water-insoluble polyethyleneimine adsorbents for the high-efficiency removal of Hg(ii) from aqueous solution
Source: Royal Society of Chemistry journal article supplement (doi:10.1039/d4ta03831b), 2024-01-01
Supplement: d4ta03831b1.pdf [file d4ta03831b1.pdf]

## Supporting Information

### Water insoluble polyethyleneimine adsorbents for the high-efficient removal of Hg(II) from aqueous solution

Xiaosai Hu, Haoran Cao, Man He, Junrui Miao, Yanyan Jin, Hongming Lv\*

Yancheng Institute of Technology, Yancheng 224051, China

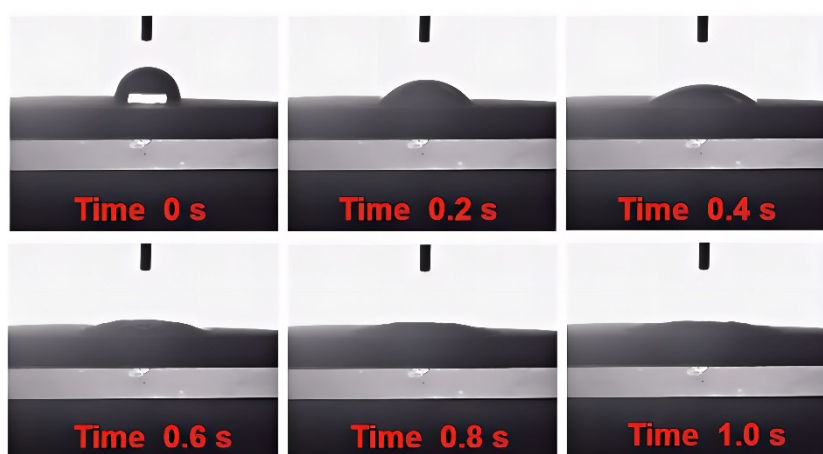

**Fig. S1** Photographs of water contact angle of PAPEI adsorbents at different contact times.

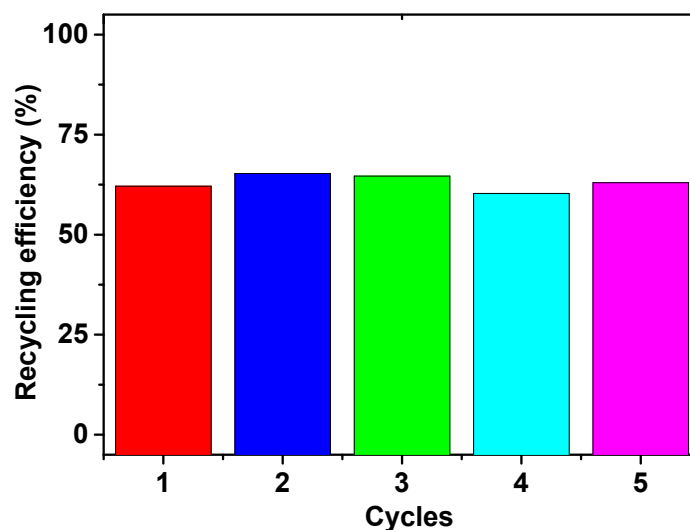

**Fig. S2** Regeneration adsorption of Hg(II) using PAPEI adsorbents for five cycles.
